# Supplementary material
Source: publisher site journal article supplement (https://www.dovepress.com/article/493903)
Supplement: Supplementary file 1 [file get_supplementary_file.php]

Supplementary Table 1. Comparison of clinical data between training and validation sets (N = 1434).

| Variable | Total  (N = 1434) | Training set  (N = 1006) | Validation set  (N = 428) | Statistics | *P*-value |
| --- | --- | --- | --- | --- | --- |
| Age (Years) |  |  |  |  |  |
| 60-69 | 929 (64.8) | 647 (64.3) | 282 (65.9) | 1.070 | 0.586 |
| 70-79 | 410 (28.6) | 288 (28.6) | 122 (28.5) |  |  |
| ≥ 80 | 95 (6.6) | 71 (7.1) | 24 (5.6) |  |  |
| BMI (kg/m2) |  |  |  |  |  |
| < 18.5 | 60 (4.2) | 41 (4.1) | 19 (4.4) | 0.119 | 0.942 |
| 18.5-23.9 | 547 (38.1) | 383 (38.1) | 164 (38.3) |  |  |
| ≥ 24 | 827 (57.7) | 582 (57.9) | 245 (57.2) |  |  |
| Gender |  |  |  |  |  |
| Female | 752 (52.4) | 533 (53.0) | 219 (51.2) | 0.396 | 0.529 |
| Male | 682 (47.6) | 473 (47.0) | 209 (48.8) |  |  |
| Marital status |  |  |  |  |  |
| Single | 351 (24.5) | 258 (25.6) | 93 (21.7) | 2.492 | 0.123 |
| Married | 1083 (75.5) | 748 (74.4) | 335 (78.3) |  |  |
| Residence |  |  |  |  |  |
| Rural | 685 (47.8) | 484 (48.1) | 201 (47.0) | 0.159 | 0.690 |
| Urban | 749 (52.2) | 522 (51.9) | 227 (53.0) |  |  |
| Education |  |  |  |  |  |
| Primary school or below | 709 (49.4) | 482 (47.9) | 227 (53.0) | 3.155 | 0.076 |
| Middle school or above | 725 (50.6) | 524 (52.1) | 201 (47.0) |  |  |
| Living alone (%) | 133 (9.3) | 101 (10.0) | 32 (7.5) | 2.344 | 0.126 |
| Current smoking (%) | 348 (24.3) | 231 (23.0) | 117 (27.3) | 3.126 | 0.077 |
| Current drinking (%) | 433 (30.2) | 310 (30.8) | 123 (28.7) | 0.614 | 0.433 |
| Physical activity |  |  |  |  |  |
| Low | 629 (43.9) | 436 (43.3) | 193 (45.1) | 2.397 | 0.302 |
| Moderate | 616 (43.0) | 444 (44.1) | 172 (40.2) |  |  |
| High | 189 (13.2) | 126 (12.5) | 63 (14.7) |  |  |
| Nutrition status |  |  |  |  |  |
| Normal nutrition | 622 (43.4) | 440 (43.7) | 182 (42.5) | 0.180 | 0.671 |
| Malnourished/Malnutrition risk | 812 (56.6) | 566 (56.3) | 246 (57.5) |  |  |
| Sleep quality |  |  |  |  |  |
| good | 804 (56.1) | 567 (56.4) | 237 (55.4) | 0.119 | 0.730 |
| poor | 630 (43.9) | 439 (43.6) | 191 (44.6) |  |  |
| T2DM duration | 10.09 [5.68, 14.43] | 10.09 [5.59, 14.36] | 10.10 [5.72, 14.55] | 0.397 | 0.691 |
| Treatment of diabetes |  |  |  |  |  |
| Diet control alone | 375 (26.2) | 261 (25.9) | 114 (26.6) | 4.879 | 0.181 |
| Oral agents | 341 (23.8) | 232 (23.1) | 109 (25.5) |  |  |
| Insulin | 359 (25.0) | 245 (24.4) | 114 (26.6) |  |  |
| Oral agents + insulin | 359 (25.0) | 268 (26.6) | 91 (21.3) |  |  |
| Comorbidities and complications | |  |  |  |  |
| Hypertension (%) | 398 (27.8) | 294 (29.2) | 104 (24.3) | 3.633 | 0.057 |
| Dyslipidemia (%) | 581 (40.5) | 404 (40.2) | 177 (41.4) | 0.178 | 0.673 |
| Cancer (%) | 28 (2.0) | 21 (2.1) | 7 (1.6) | 0.320 | 0.571 |
| Anemia (%) | 319 (22.2) | 210 (20.9) | 109 (25.5) | 3.661 | 0.056 |
| Osteoporosis (%) | 449 (31.3) | 317 (31.5) | 132 (30.8) | 0.063 | 0.802 |
| Cardiovascular disease (%) | 399 (27.8) | 294 (29.2) | 105 (24.5) | 3.291 | 0.070 |
| Diabetic retinopathy (%) | 164 (11.4) | 119 (11.8) | 45 (10.5) | 0.513 | 0.474 |
| Diabetic nephropathy (%) | 373 (26.0) | 266 (26.4) | 107 (25.0) | 0.324 | 0.569 |
| Diabetic neuropathy (%) | 144 (10.0) | 101 (10.0) | 43 (10.0) | 0.001 | 0.997 |
| Diabetic angiopathy (%) | 40 (2.8) | 27 (2.7) | 13 (3.0) | 0.138 | 0.710 |
| Laboratory values |  |  |  |  |  |
| FBG (mmol/L) | 7.38 [6.70, 8.90] | 7.40 [6.70, 8.87] | 7.30 [6.60, 9.13] | 0.092 | 0.926 |
| BUN (mmol/L) | 5.50 [4.60, 6.70] | 5.45 [4.50, 6.70] | 5.50 [4.60, 6.70] | 0.386 | 0.700 |
| Scr (μmol/L) | 67.60 [57.60, 81.70] | 68.00 [58.30, 82.03] | 66.15 [56.50, 80.90] | 1.857 | 0.063 |
| TC (mmol/L) | 4.91 ± 1.03 | 4.92 ± 1.07 | 4.89 ± 0.96 | 0.404 | 0.686 |
| TG (mmol/L) | 2.01 [1.51, 2.52] | 2.02 [1.50, 2.51] | 1.98 [1.52, 2.55] | 0.154 | 0.877 |
| HDL-C (mmol/L) | 1.23 [1.07, 1.43] | 1.22 [1.06, 1.43] | 1.24 [1.09, 1.44] | 1.268 | 0.205 |
| LDL-C (mmol/L) | 2.71 [2.20, 3.20] | 2.73 [2.19, 3.21] | 2.66 [2.22, 3.15] | 0.604 | 0.546 |
| CRP (mg/L) | 1.90 [1.10, 3.50] | 1.90 [1.00, 3.50] | 1.95 [1.00, 3.50] | 0.198 | 0.843 |
| UA (μmol/L) | 297.40 [243.67, 356.88] | 297.40 [243.87, 356.88] | 297.40 [249.82, 350.93] | 0.088 | 0.930 |
| HbA1c (%) | 8.94 [8.27, 9.51] | 8.92 [8.25, 9.48] | 8.97 [8.31, 9.59] | 1.286 | 0.198 |
| Cys-C (mg/L) | 0.94 ± 0.27 | 0.95 ± 0.25 | 0.93 ± 0.25 | 1.388 | 0.165 |
| 25-OH-Vitamin D (ng/mL) | 25.57 [17.76, 36.58] | 25.33 [17.64, 35.49] | 26.30 [17.97, 38.20] | 1.012 | 0.312 |
| SBP (mmHg) | 134.73 ± 20.39 | 134.04 ± 19.92 | 136.35 ± 21.41 | 1.965 | 0.050 |
| DBP (mmHg) | 75.00 ± 11.00 | 74.66 ± 10.86 | 75.81 ± 11.30 | 1.820 | 0.069 |

**Note.** Data were depicted as Mean ± standard deviation, Median (P25, P75), or N (%).

*P* < 0.05, statistically significant.

**Abbreviation:** BMI, Body Mass Index; BUN, blood urea nitrogen; CRP, C-reactive protein; UA, uric acid; Cysc, Cystatin C; DBP, diastolic blood pressure; FBG, fasting blood glucose; HDL-C, high-density lipoprotein cholesterol; HbA1c, glycated hemoglobin A1c; LDL-C, low-density lipoprotein cholesterol; TG, total triglycerides; TC, total cholesterol; T2DM, type 2 diabetes mellitus; SBP, systolic blood pressure; Scr, serum creatinine.
